# Supplementary material for: CD68, CD163, and matrix metalloproteinase 9 (MMP-9) co-localization in breast tumor microenvironment predicts survival differently in ER-positive and -negative cancers
Source: Springer Nature journal article supplement (doi:10.1186/s13058-018-1076-x), 2018-12-01
Supplement: MOESM3 [file 16347810]

**Table S1****Clinicopathological characteristics according to CD68 and CD163 QIF scores in cohort A**

| <b>COHORT A</b>           | <b>CD68 Low</b> | <b>CD68 High</b> | <b>p-value</b> | <b>CD163 Low</b> | <b>CD163 High</b> | <b>p-value</b> |
|---------------------------|-----------------|------------------|----------------|------------------|-------------------|----------------|
| <b>ER</b>                 |                 |                  | 0.95           |                  |                   | <b>0.002</b>   |
| <b>ER Negative</b>        | 34              | 38               |                | 16               | 37                |                |
| <b>ER Positive</b>        | 60              | 66               |                | 51               | 40                |                |
| <b>PR</b>                 |                 |                  | 0.26           |                  |                   | 0.05           |
| <b>PR Negative</b>        | 34              | 48               |                | 20               | 35                |                |
| <b>PR Positive</b>        | 55              | 56               |                | 45               | 40                |                |
| <b>HER2</b>               |                 |                  | 0.77           |                  |                   | 0.09           |
| <b>HER2 Negative</b>      | 24              | 38               |                | 19               | 27                |                |
| <b>HER2 Positive</b>      | 6               | 8                |                | 1                | 7                 |                |
| <b>Size</b>               |                 |                  | <b>0.08</b>    |                  |                   | 0.09           |
| <b>&lt;2cm</b>            | 73              | 62               |                | 48               | 43                |                |
| <b>&gt;2 cm</b>           | 34              | 47               |                | 26               | 37                |                |
| <b>Age</b>                |                 |                  | 0.5            |                  |                   | 0.09           |
| <b>&lt;50 Years</b>       | 37              | 44               |                | 24               | 34                |                |
| <b>50 or &gt;50 years</b> | 80              | 69               |                | 61               | 48                |                |
| <b>LN Status</b>          |                 |                  | 0.16           |                  |                   |                |
| <b>LN neg</b>             | 56              | 65               |                | 68               | 64                | <b>0.001</b>   |
| <b>LN pos</b>             | 9               | 23               |                | 1                | 11                |                |
| <b>Grade</b>              |                 |                  | 0.33           |                  |                   | 0.53           |
| <b>1or 2</b>              | 26              | 40               |                | 19               | 30                |                |
| <b>3</b>                  | 21              | 46               |                | 15               | 31                |                |
| <b>Recurrence</b>         |                 |                  | 0.11           |                  |                   | 0.11           |
| <b>Yes</b>                | 86              | 93               |                | 86               | 93                |                |
| <b>No</b>                 | 32              | 21               |                | 32               | 21                |                |

**Table S2**

**Clinicopathological characteristics according to MMP-9 QIF scores in CD68 and CD163 compartments in cohort A**

| <b>COHORT A</b>           | <b>MMP-9 Low in CD68+/CD163+</b> | <b>MMP-9 High in CD68+/CD163+</b> | <b>p-value</b> | <b>MMP-9 Low in CD68+</b> | <b>MMP-9 High in CD68+</b> | <b>p-value</b> |
|---------------------------|----------------------------------|-----------------------------------|----------------|---------------------------|----------------------------|----------------|
| <b>ER</b>                 |                                  |                                   |                |                           |                            |                |
| <b>ER Negative</b>        | 17                               | 36                                | <b>0.02</b>    | 18                        | 35                         | <b>0.02</b>    |
| <b>ER Positive</b>        | 47                               | 44                                |                | 48                        | 43                         |                |
| <b>PR</b>                 |                                  |                                   |                |                           |                            | 0.07           |
| <b>PR Negative</b>        | 18                               | 37                                | <b>0.03</b>    | 20                        | 35                         |                |
| <b>PR Positive</b>        | 37                               | 42                                |                | 44                        | 41                         |                |
| <b>HER2</b>               |                                  |                                   |                |                           |                            | 0.5            |
| <b>HER2 Negative</b>      | 22                               | 24                                |                | 23                        | 23                         |                |
| <b>HER2 Positive</b>      | 2                                | 6                                 | 0.21           | 3                         | 5                          |                |
| <b>Size</b>               |                                  |                                   | 0.83           |                           |                            | 0.25           |
| <b>&lt;2cm</b>            | 42                               | 49                                |                | 46                        | 45                         |                |
| <b>&gt;2 cm</b>           | 28                               | 25                                |                | 26                        | 37                         |                |
| <b>Age</b>                |                                  |                                   | 0.17           |                           |                            | 0.14           |
| <b>&lt;50 Years</b>       | 24                               | 34                                |                | 24                        | 34                         |                |
| <b>50 or &gt;50 years</b> | 58                               | 58                                |                | 59                        | 50                         |                |
| <b>LN Status</b>          |                                  |                                   | 0.8            |                           |                            | 0.8            |
| <b>LN neg</b>             | 60                               | 72                                |                | 61                        | 71                         |                |
| <b>LN pos</b>             | 5                                | 7                                 |                | 6                         | 6                          |                |
| <b>Grade</b>              |                                  |                                   | 0.24           |                           |                            | 0.18           |
| <b>1 or 2</b>             | 17                               | 32                                |                | 19                        | 30                         |                |
| <b>3</b>                  | 11                               | 35                                |                | 12                        | 34                         |                |
| <b>Recurrence</b>         |                                  |                                   | 0.22           |                           |                            | 0.44           |
| <b>Yes</b>                | 24                               | 18                                |                | 23                        | 19                         |                |
| <b>No</b>                 | 59                               | 68                                |                | 61                        | 66                         |                |

**Table S3**

**Clinicopathological characteristics according to CD68 and CD163 QIF scores in cohort B**

| <b>COHORT B</b>  | <b>CD68 Low</b> | <b>CD68 High</b> | <b>p-value</b> | <b>CD163 Low</b> | <b>CD163 High</b> | <b>p-value</b> |
|------------------|-----------------|------------------|----------------|------------------|-------------------|----------------|
| <b>Size</b>      |                 |                  | 0.18           |                  |                   | 0.53           |
| <2cm             | 15              | 10               |                | 12               | 11                |                |
| >2 cm            | 20              | 26               |                | 19               | 24                |                |
| <b>Age</b>       |                 |                  | 0.12           |                  |                   | 0.5            |
| <50 Years        | 14              | 25               |                | 17               | 19                |                |
| 50 or >50 years  | 27              | 20               |                | 20               | 23                |                |
| <b>LN Status</b> |                 |                  | 0.25           |                  |                   | 0.51           |
| LN neg           | 11              | 4                |                | 9                | 4                 |                |
| LN pos           | 8               | 7                |                | 8                | 6                 |                |
| <b>Grade</b>     |                 |                  | 0.94           |                  |                   | 0.31           |
| 1 or 2           | 11              | 12               |                | 11               | 9                 |                |
| 3                | 23              | 26               |                | 20               | 28                |                |
| <b>Stage</b>     |                 |                  | 0.38           |                  |                   | 0.6            |
| I-II             | 14              | 15               |                | 14               | 2                 |                |
| III-IV           | 1               | 3                |                | 12               | 1                 |                |

**Table S4**  
**Clinicopathological characteristics according to MMP-9 QIF scores in CD68 and CD163 compartments in cohort B**

| <b>COHORT B</b>  | <b>MMP-9 Low in CD68+/CD163+</b> | <b>MMP-9 High in CD68+/CD163+</b> | <b>p-value</b> | <b>MMP-9 Low in CD68+</b> | <b>MMP-9 High in CD68+</b> | <b>p-value</b> |
|------------------|----------------------------------|-----------------------------------|----------------|---------------------------|----------------------------|----------------|
| <b>Size</b>      |                                  |                                   | 0.06           |                           |                            | 0.13           |
| <2cm             | 14                               | 7                                 |                | 13                        | 8                          |                |
| >2 cm            | 18                               | 25                                |                | 18                        | 25                         |                |
| <b>Age</b>       |                                  |                                   | 0.24           |                           |                            | 0.25           |
| <50 Years        | 15                               | 19                                |                | 15                        | 19                         |                |
| 50 or >50 years  | 21                               | 21                                |                | 20                        | 22                         |                |
| <b>LN Status</b> |                                  |                                   | 0.42           |                           |                            | 0.45           |
| LN neg           | 10                               | 7                                 |                | 11                        | 5                          |                |
| LN pos           | 4                                | 6                                 |                | 6                         | 5                          |                |
| <b>Grade</b>     |                                  |                                   | <b>0.01</b>    |                           |                            | <b>0.009</b>   |
| 1or 2            | 13                               | 5                                 |                | 13                        | 5                          |                |
| 3                | 18                               | 29                                |                | 17                        | 30                         |                |
| <b>Stage</b>     |                                  |                                   | 0.76           |                           |                            | 0.7            |
| I-II             | 15                               | 2                                 |                | 15                        | 10                         |                |
| III-IV           | 11                               | 1                                 |                | 2                         | 2                          |                |
